# Supplementary material
Source: HighWire-hosted journal article supplement (https://www.life-science-alliance.org/content/1/5/e201800187/F16)

anti\_GFP

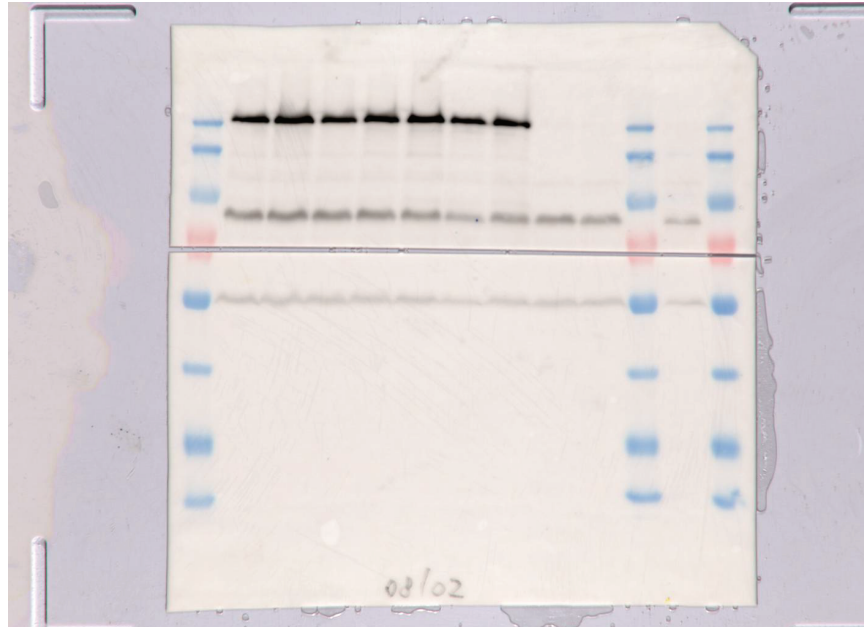

anti\_Tubulin

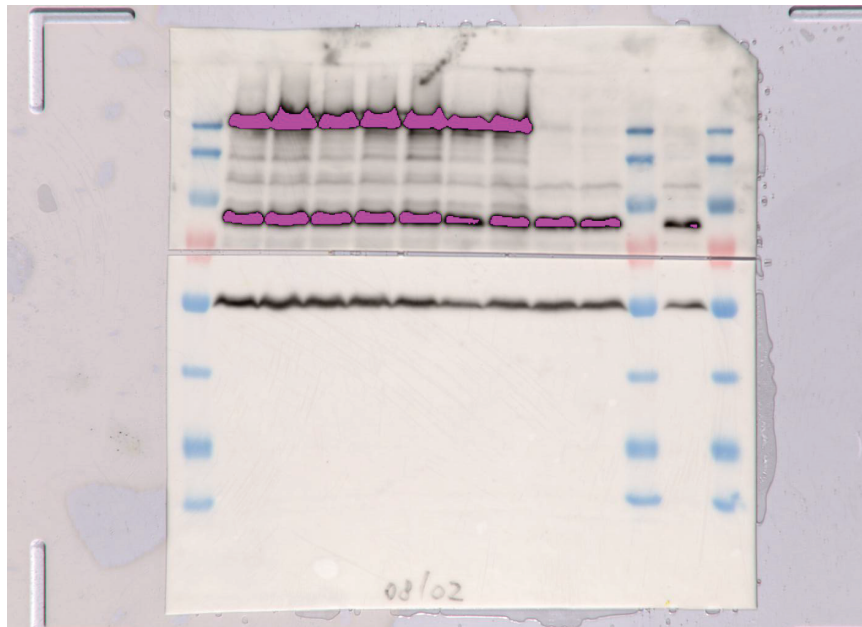

anti\_Stau

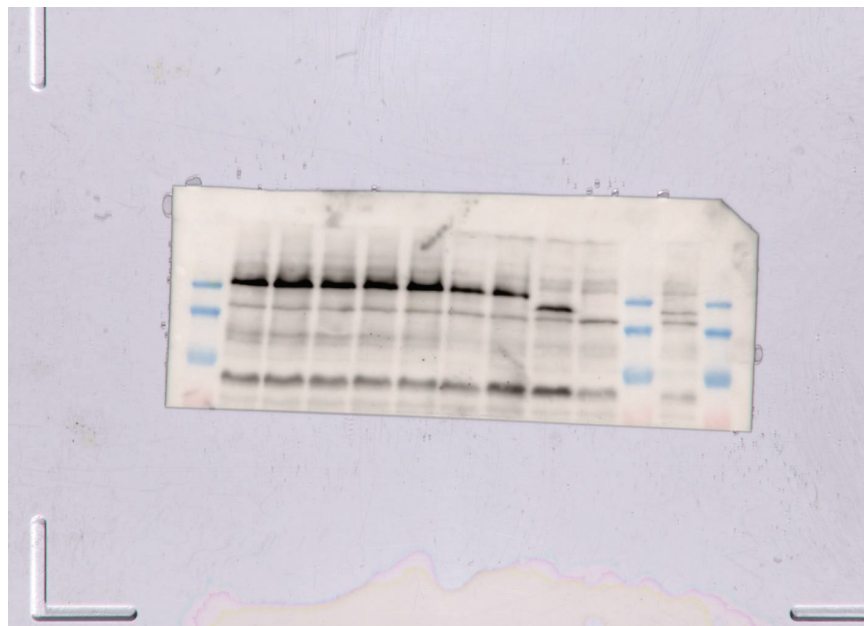

Supplement: inline-supplementary-material-1 [file inline-supplementary-material-1.pdf]
